# Supplementary material for: Novel alignment technique for LCD-biosensorsElectronic supplementary information (ESI) available: alignment layer formation and structure, FT-IR spectra and polarising microscopic images. See http://www.rsc.org/suppdata/cc/b3/b310860k/
Source: Royal Society of Chemistry journal article supplement (doi:10.1039/b310860k), 2003-01-01
Supplement: b310860k.doc [file b310860k.doc]

Supplemental info for “Novel alignment technique for LCD-biosensors”

Additional Experimental techniques:

The PI-ITO plate with the drop of buffer is placed in a Petri dish, after which a pipette is used to blow the drop from one end of the substrate to the other under an angle of 45 ° (see: Li *et al*, *Nucleic Acids Research*, 1998, **26**(20), 4785-4786). The nitrogen flow is adjusted so that the drop traverses the 1,5 cm long plate in about 5 seconds. After the drop has reached the far side of the plate, the Petri dish is turned 180 degrees and the process is repeated until the drop has dried.


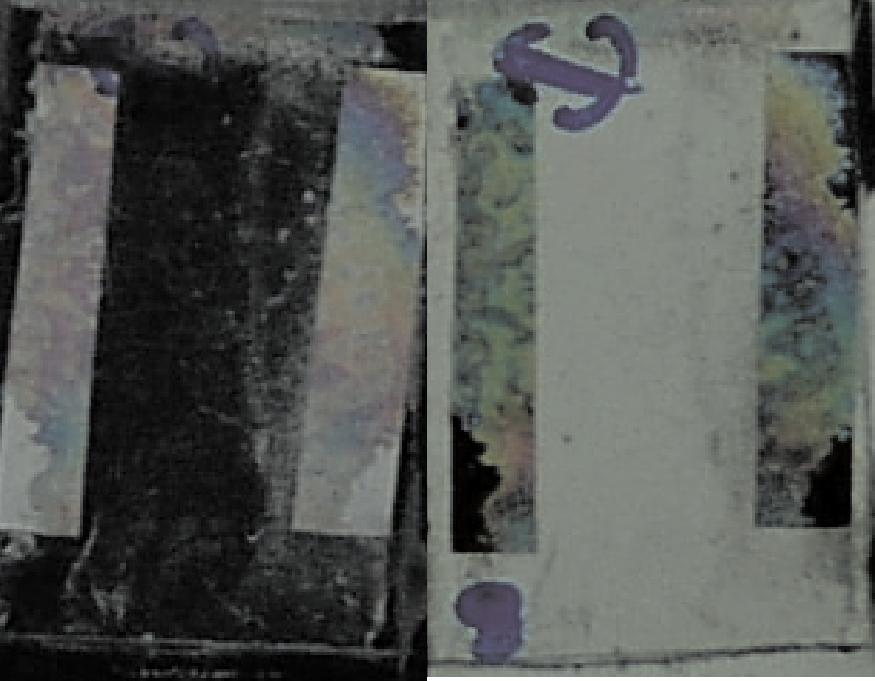


Twisted-nematic LCD with a directionally dried TE-covered plate (direction of blowing: top-bottom), with a PI-counter plate rubbed in the left-right direction (as indicated by the arrow). The image on the left is viewed between crossed polarisers, the one on the right between parallel polarisers. The anchoring energy between the TE-layer and the LC is not sufficiently high to disrupt LC-ordering induced by the PI-plate. Image is 1,0 X 0,8 cm.


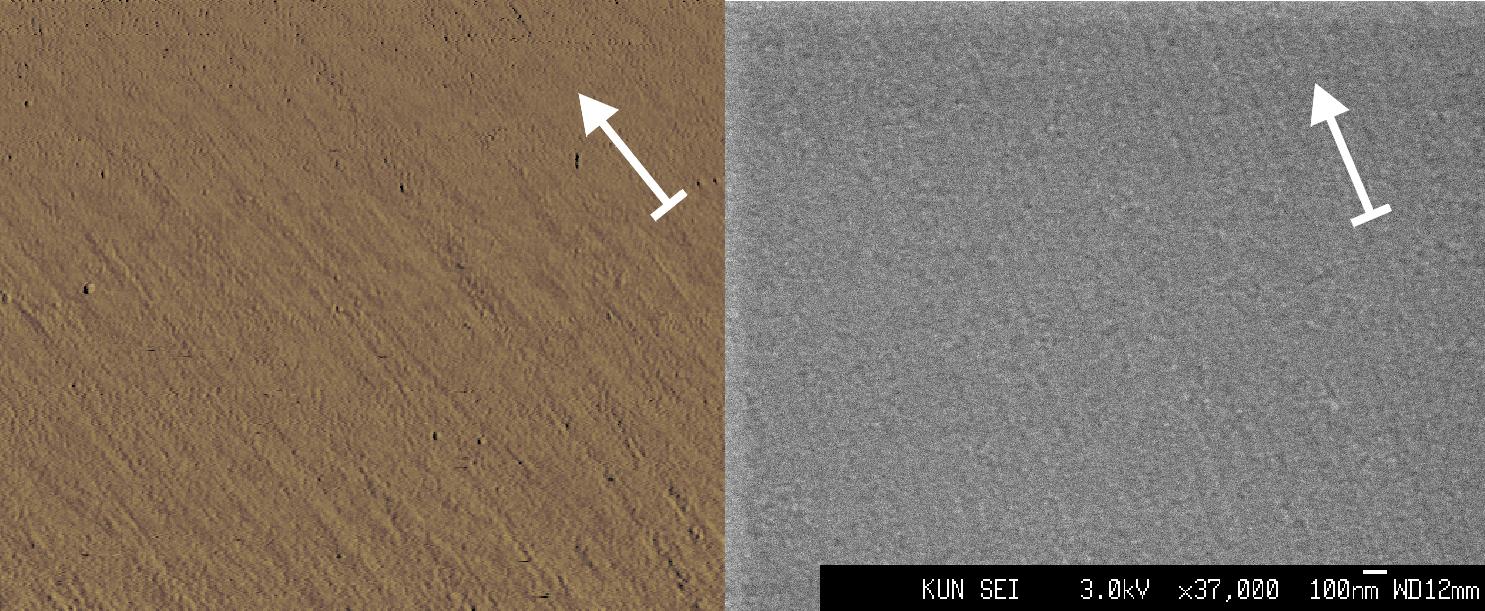


AFM (left) and SEM (right) images of a TE-covered PI-ITO plate made by directional drying. The arrow indicates the direction of blowing. The AFM image is 3 X 2.5 m, the bar in the SEM image is 100 nm.

### SEM image of DNA on TE-buffer layer

###
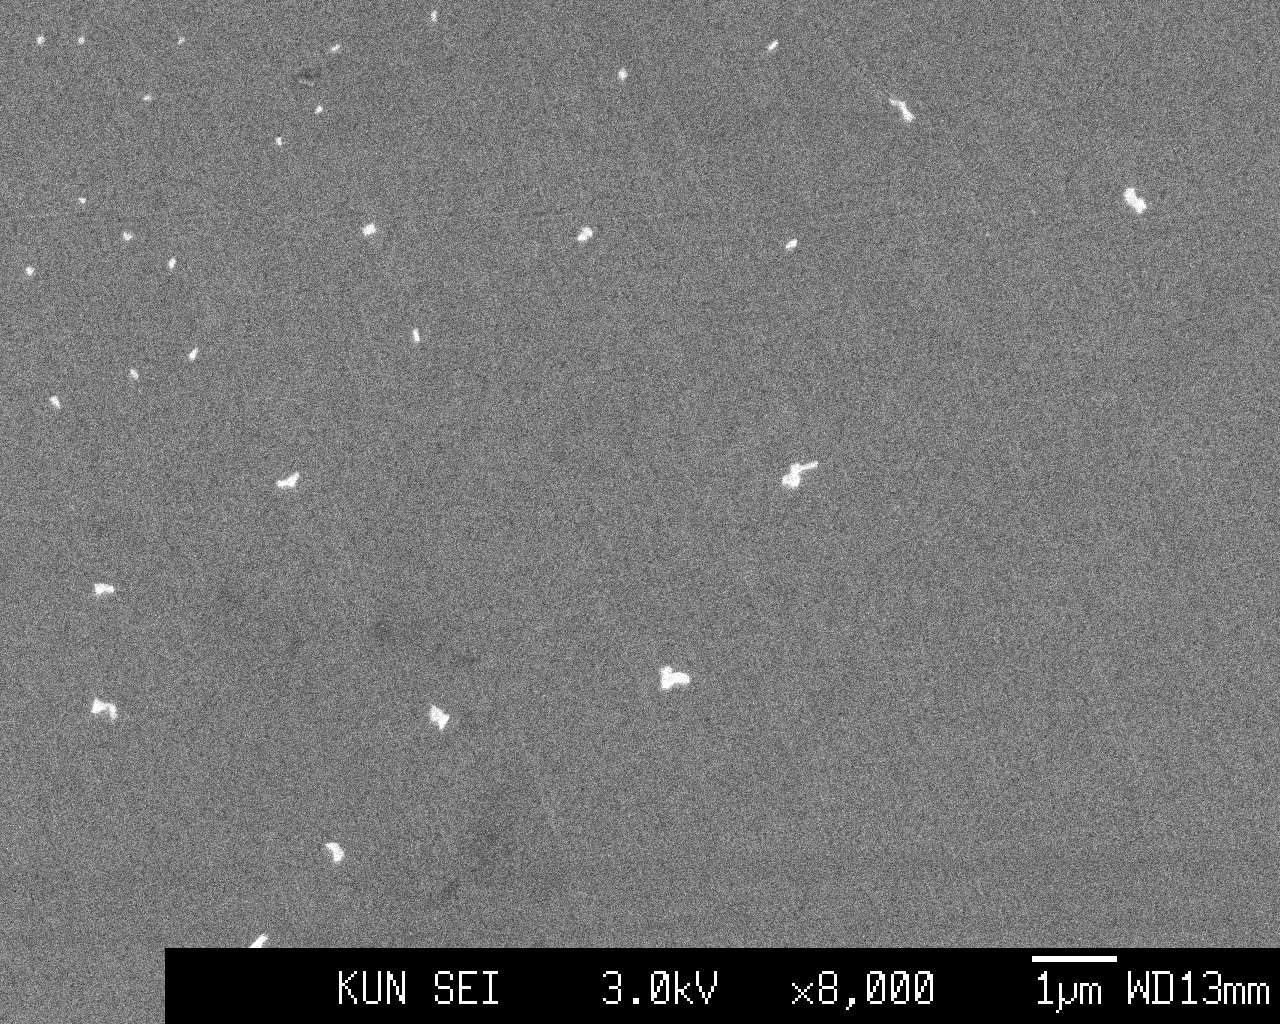


### FT-IR spectra

Note: directional drying was maintained for the indicated times.

OH- and NH-region of a directionally dried TE-buffer in H2O.

Determining the exact water content for the transition observed in these experiments (by weighing) proved difficult, gave irreproducible results and was not attempted further.

Black: 5 minutes, blue: 10 minutes, red: 15 minutes.

Ether-region (C-O and C-N) of a directionally dried TE-buffer in H2O.

Black: 5 minutes, blue: 10 minutes, red: 15 minutes.

Carbonyl region of directionally dried TE-buffer in H2O (red) and D2O (blue). Drying time both 15 minutes.

Key shifts induced by the change of the solvent:

1540.00→1535.28

1533.01→1529.45

1521.05→1518.25

1516.16→1513.39

1506.95→1502.97

OH- and NH-region of directionally dried TE-buffer in H2O (red) and D2O (blue). Drying time both 15 minutes.

Carbonyl region of a directionally dried TE-buffer from H2O (black, drying time 15 minutes) and a mixture of equimolar amounts of solid Tris-EDTA which was ground in a mortar (red).

###
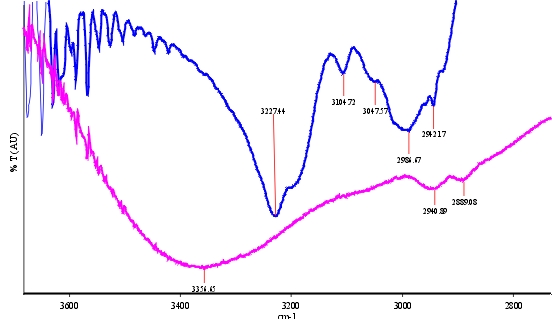


OH- and NH-region of a directionally (blue) and non-directionally (purple) dried drop of TE-buffer on a PI-ITO plate.

### Directional drying of a 10 mM Urea solution


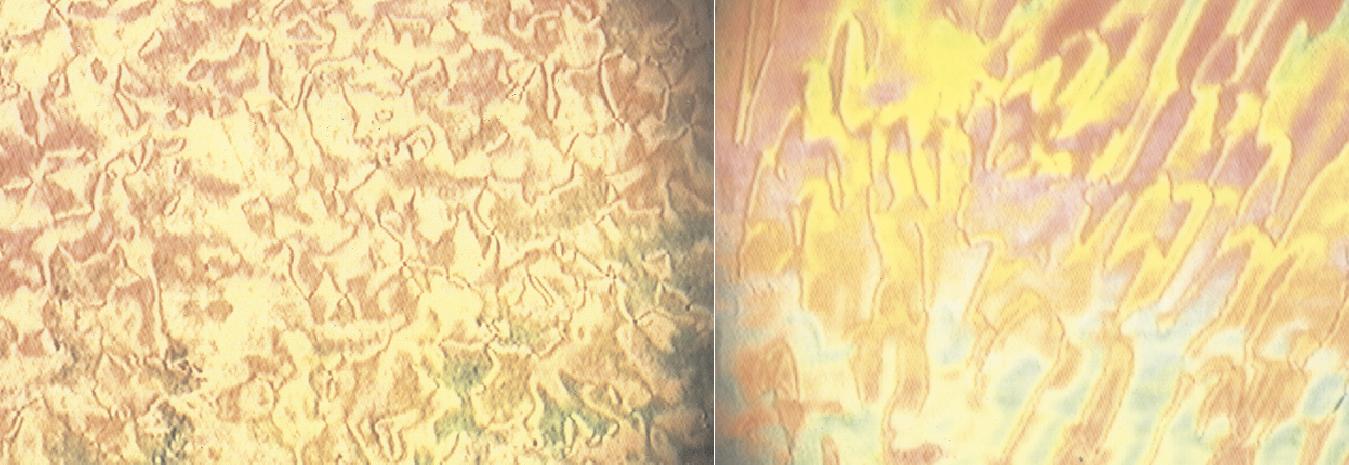


Parallel LCDs made by directional blowing of a 10mM Urea solution show partial LC alignment (right image).

### Note on the stability of the alignment layer

The observation that the alignment is lost after seven days can be explained in different ways. Two likely possibilities are:

1. The buffer gradually dissolves in 5CB over time. Experiments show that the same amount of buffer present on the surface can be dissolved in 1 ml of 5CB by sonicating at room temperature for 30 minutes.
2. The surface ordering is gradually lost by the thermal reshuffling of the hydrogen bond network, also possibly involving interactions with the cyano-group of the LC: SEM experiments showed that the surface order disappears within seven days, resulting in a featureless surface.”
